# Supplementary material for: Top-Leader Growth in Nordmann Fir (Abies nordmanniana)
Source: MDPI journal article supplement (doi:10.3390/f14061214), 2023-06-12
Supplement: s1 [file s1]

Table S1. Maximum temperature at the Christmas tree farms located in Jutland at Starupvej, 8340 Malling (N56.0276. E10.20587) in the years 2016–2019 and, on Zealand at Røglevej, 3540 Lynge (N55.8558. E12.2948) in 2020–2022.

| Maximum Temperature, °C |       |      |      |      |        |           |         |          |
|-------------------------|-------|------|------|------|--------|-----------|---------|----------|
|                         | April | May  | June | July | August | September | October | November |
| 2016                    | 12.7  | 24.2 | 26.9 | 26.4 | 29.9   | 26.2      | 15.7    | 12.0     |
| 2017                    | 16.3  | 24.8 | 25.2 | 23.6 | 24.6   | 19.5      | 17.7    | 12.8     |
| 2018                    | 26.1  | 26.6 | 28.2 | 30.9 | 29.1   | 24.7      | 22.0    | 12.0     |
| 2019                    | 20.5  | 21.6 | 29.4 | 30.5 | 27.9   | 21.2      | 15.7    | 1.08     |
| 2020                    | 19.5  | 21.7 | 27.7 | 26.2 | 30.7   | 26.4      | 17.7    | 17.1     |
| 2021                    | 18.3  | 23.6 | 30.2 | 29.4 | 25.5   | 24.9      | 17.7    | 13.3     |
| 2022                    | 17.8  | 22.7 | 27.6 | 31.3 | 31.3   | 21.4      | 19.5    | 14.4     |

Table S2. Minimum temperature at the Christmas tree farms located in Jutland at Starupvej, 8340 Malling (N56.0276. E10.20587) in the years 2016–2019 and, on Zealand at Røglevej, 3540 Lynge (N55.8558. E12.2948) in 2020–2022.

| Minimum Temperature, °C |       |      |      |      |        |           |         |          |
|-------------------------|-------|------|------|------|--------|-----------|---------|----------|
|                         | April | May  | June | July | August | September | October | November |
| 2016                    | -2.0  | -1.0 | 4.3  | 9.2  | 5.8    | 4.8       | 1.8     | -6.2     |
| 2017                    | -2.1  | -0.5 | 6.9  | 5.0  | 6.2    | 3.4       | -0.9    | -4.1     |
| 2018                    | -3.6  | 0.5  | 6.0  | 7.0  | 7.2    | 3.5       | -1.6    | -4.9     |
| 2019                    | -5.4  | -1.4 | 4.8  | 4.7  | 7.7    | 4.4       | -4.2    | -2.2     |
| 2020                    | -2.0  | -1.8 | 5.6  | 5.5  | 7.4    | 2.0       | -1.1    | -1.9     |
| 2021                    | -4.1  | 1.9  | 6.6  | 9.5  | 6.1    | 4.4       | 0.7     | -4.1     |
| 2022                    | -5.3  | 1.0  | 4.7  | 7.9  | 6.7    | 3.2       | -1.8    | -6.0     |

Table S3. Precipitation at the Christmas tree farms located in Jutland at Starupvej, 8340 Malling (N56.0276. E10.20587) in the years 2016–2019 and, on Zealand at Røglevej, 3540 Lynge (N55.8558. E12.2948) in 2020–2022.

| Precipitation, mm |       |     |      |      |        |           |         |          |
|-------------------|-------|-----|------|------|--------|-----------|---------|----------|
|                   | April | May | June | July | August | September | October | November |
| 2016              | 104   | 55  | 70   | 107  | 46     | 18        | 114     | 77       |
| 2017              | 55    | 24  | 108  | 72   | 78     | 93        | 82      | 49       |
| 2018              | 45    | 18  | 21   | 11   | 115    | 62        | 44      | 29       |
| 2019              | 16    | 79  | 42   | 66   | 90     | 117       | 108     | 84       |
| 2020              | 16    | 40  | 84   | 58   | 44     | 55        | 73      | 24       |
| 2021              | 18    | 91  | 19   | 101  | 121    | 62        | 83      | 45       |
| 2022              | 33    | 59  | 38   | 22   | 62     | 92        | 42      | 23       |

Table S4. Sunshine at the Christmas tree farms located in Jutland at Starupvej, 8340 Malling (N56.0276. E10.20587) in the years 2016–2019 and, on Zealand at Røglevej, 3540 Lyngø (N55.8558. E12.2948) in 2020–2022.

| Sunshin, h |       |     |      |      |        |           |         |          |
|------------|-------|-----|------|------|--------|-----------|---------|----------|
|            | April | May | June | July | August | September | October | November |
| 2016       | 129   | 262 | 241  | 166  | 198    | 204       | 74      | 73       |
| 2017       | 154   | 239 | 184  | 194  | 178    | 114       | 85      | 67       |
| 2018       | 184   | 365 | 301  | 352  | 158    | 126       | 121     | 39       |
| 2019       | 272   | 208 | 249  | 225  | 192    | 127       | 86      | 29       |
| 2020       | 272   | 250 | 288  | 174  | 264    | 165       | 93      | 47       |
| 2021       | 238   | 183 | 281  | 219  | 177    | 145       | 105     | 39       |
| 2022       | 258   | 229 | 234  | 241  | 250    | 152       | 112     | 38       |

Table S5. Drought index at the Christmas tree farms located in Jutland at Starupvej, 8340 Malling (N56.0276. E10.20587) in the years 2016–2019 and, on Zealand at Røglevej, 3540 Lyngø (N55.8558. E12.2948) in 2020–2022. The drought index represents a scale from 0–10, where 0 indicates maximal water reserves in the upper 10 cm of the soil, 5 indicates 50% water reserve, and 10 that there is no water available for growth (<https://www.dmi.dk/dmis-vejrprodukter/torkeindeks/>)

| Drought index |       |     |      |      |        |           |         |          |
|---------------|-------|-----|------|------|--------|-----------|---------|----------|
|               | April | May | June | July | August | September | October | November |
| 2016          | 0.0   | 0.0 | 5.3  | 1.9  | 0.0    | 6.0       | 0.0     | 0.0      |
| 2017          | 0.0   | 0.0 | 3.4  | 0.0  | 0.0    | 0.0       | 0.0     | 0.0      |
| 2018          | 1.8   | 5.6 | 9.2  | 9.9  | 5.4    | 1.3       | 1.3     | 0.1      |
| 2019          | 5.9   | 7.5 | 9.4  | 4.6  | 2.1    | 2.1       | 0.1     | 0.0      |
| 2020          | 8.1   | 9.2 | 8.5  | 8.1  | 9.0    | 7.4       | 2.8     | 0.0      |
| 2021          | 5.0   | 6.7 | 9.4  | 7.8  | 3.5    | 3.9       | 0.5     | 0.0      |
| 2022          | 6.0   | 9.3 | 8.4  | 9.7  | 9.2    | 6.6       | 2.0     | 0.2      |
